# Supplementary material for: Investigation of rootzone salinity with field monitoring system at tsunami affected rice fields in Miyagi, Japan
Source: Copernicus journal article supplement (doi:10.5194/soil-2016-12), 2016-03-18
Supplement: Supplementary file [file soil-2016-12-AC1-supplement.pdf]

## **Response to the reviewer1 comments**

Thank you for reviewer comments. They helped strengthen our paper. We revised the manuscript as much as possible in line with the suggestions made by the reviewer 1.

### ***Reviewer 1.***

#### **General comments**

Our original manuscript focused on monitoring soil moisture content ( $\theta$ ) and bulk soil EC ( $EC_b$ ) using the Field Monitoring System (FMS) to work on desalinization process of tsunami affected agricultural fields. However, Reviewer 1 noted it lacked a scientific focus. In the revised manuscript, we described what the advantage of FMS is and how meaningful the FMS data is for new approaches:  $EC_b$ - $\theta$ -soil water EC( $EC_w$ ) relationship and two dimensional water and chloride transport for better future scenario of the surface water canal system. Based on field data ( $EC_b$ ,  $\theta$ , and estimated  $EC_w$ ) and the simulation results, we discussed the saltwater intrusion management of the future surface canal system.

#### **Specific comments**

- 1) Line 60-65. The technical details of FMS were shorten in the Materials and Methods section.
- 2) Line 85. In the introduction section, the problems of land subsidence and the consequences for saline water intrusion were mentioned.
- 3) Line 112. Also, the current situation of desalinization regarding underdrains was described to explain why we cannot use underdrains at our research sites.
- 4) Line 179. In the materials and methods section, “soil core sampling method” was added to measure the saturated hydraulic conductivity.
- 5) Line 187. The sentence was deleted, but the similar content was rewritten as “a rise in saline groundwater...” in results and discussion section.
- 6) Line 189 – 213. The sentences were rewritten based on the presented data.
- 7) Line 248 – 276. Previous studies of the future canal system were presented in the introduction. To predict chloride transport using the water surface canal system, we obtained  $EC_b$ - $\theta$ - $EC_w$  relationship and simulation of two dimensional water and chloride transport was carried out. It would be helpful because it was based on in-situ data using the FMS with TDT measurements.
